# Supplementary material for: Using next-generation sequencing for high resolution multiplex analysis of copy number variation from nanogram quantities of DNA from formalin-fixed paraffin-embedded specimens
Source: PubMed Central journal article supplement — Nucleic Acids Res. 2010 Jun 4;38(14):e151. doi: 10.1093/nar/gkq510 (PMC2919738; doi:10.1093/nar/gkq510), 2010-06-04
Supplement: gkq510_1.pdf [file gkq510_1.pdf]

# LUDLU1

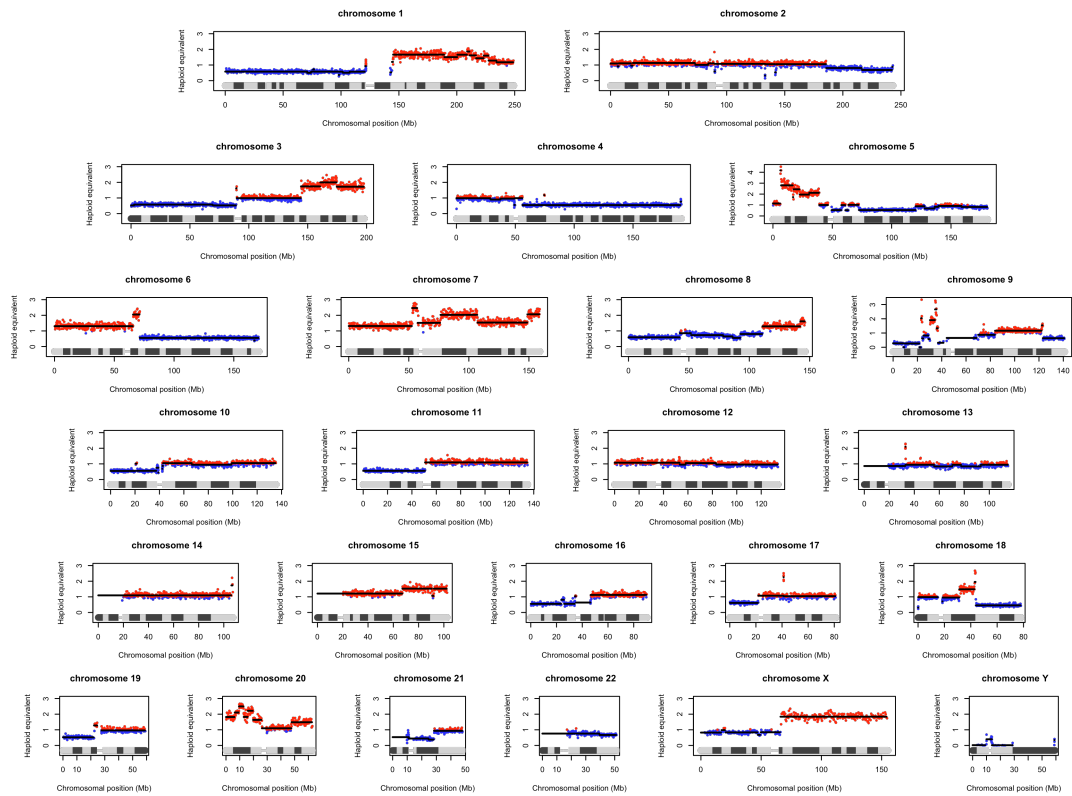

Supplementary figure 1: Complete copy number karyogram from cell line LUDLU-1 normalised against normal counterpart AGLCL. Each plot is of haploid copy number equivalent versus chromosomal position.

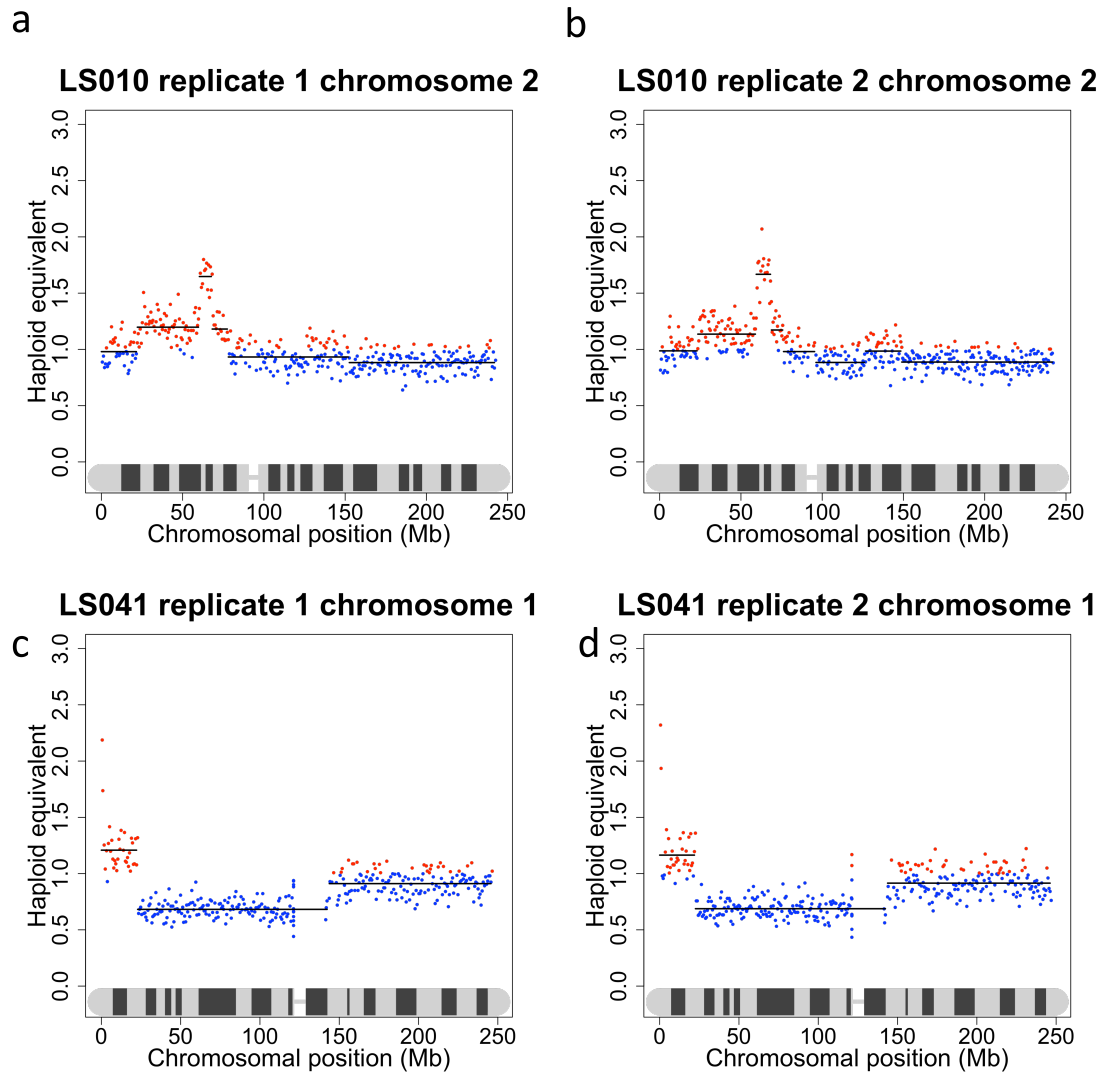

Supplementary figure 2: Example of the reproducibility of the method. Analysis on 4 tumour:normal pairs was replicated on lanes 1 and 2 of an Illumina GAI run. Chromosome 2 from sample LS010 is shown in replicate (a and b) as well as chromosome 1 from sample LS041 (c and d).
